# Supplementary material
Source: PubMed Central journal article supplement (PMC3857030)

**Supplemental Figure 1. Visible standard reference spectra of AHb1 and AHb2 proteins.** UV-Visible spectra of deoxy- (black), oxy- (red), met- (green), and iron-nitrosyl- (blue) AHb1 (A) and AHb2 (B). Spectra were normalized at 700 nm and the 450 - 700 nm visible portion (**inset**) was utilized for least-squares analysis of multi-component spectra.

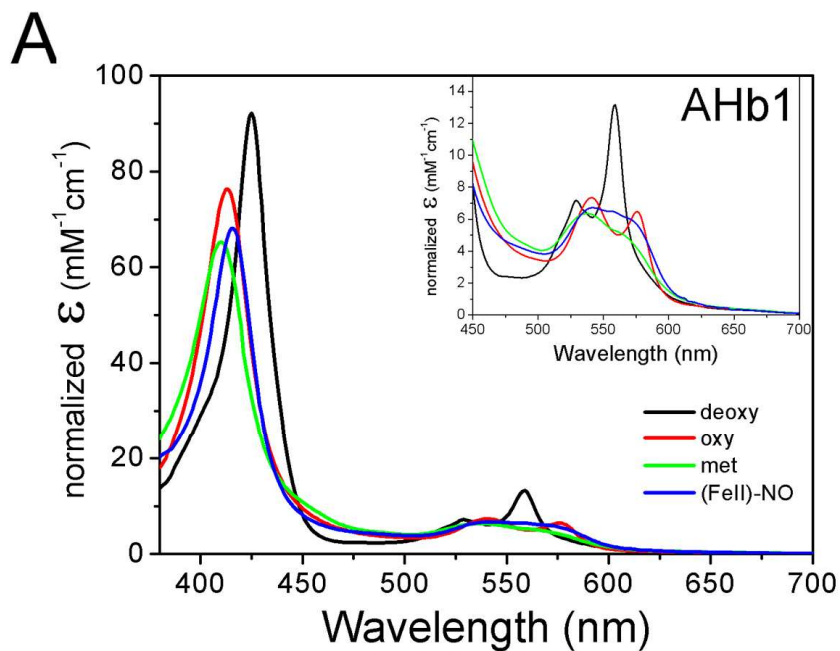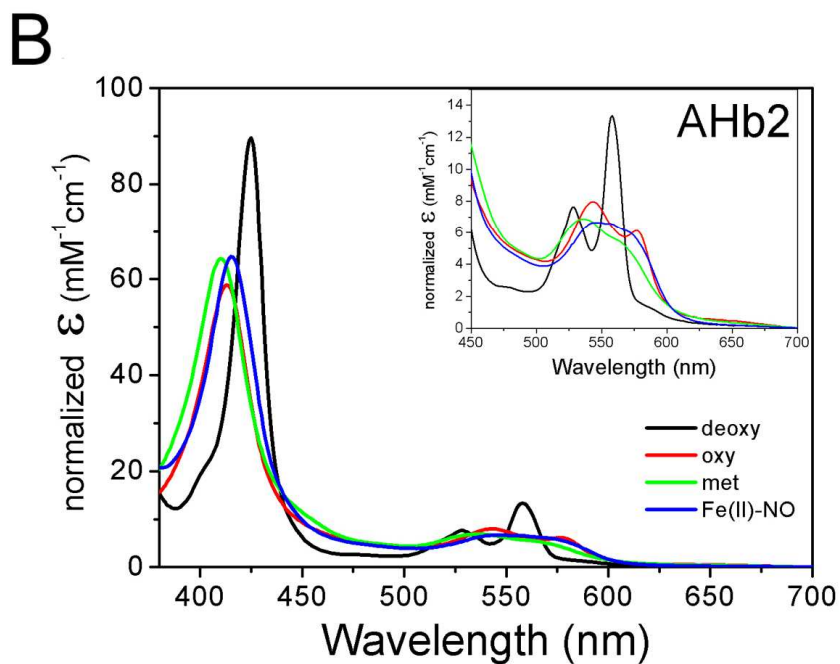

Supplement: NIHMS387492-supplement-1_si_001.pdf [file NIHMS387492-supplement-1_si_001.pdf]
